# Supplementary material for: A wet-resistant and low-temperature self-healing organohydrogel sensor towards direction-recognition and information transmission in extreme environments
Source: Royal Society of Chemistry journal article supplement (doi:10.1039/d3tc03236a), 2023-01-01
Supplement: d3tc03236a1.pdf [file d3tc03236a1.pdf]

## Supplementary Information

### A wet-resistant and low-temperature self-healing organohydrogel sensor towards direction-recognition and information transmission in extreme environment

Enke Feng,<sup>‡\*</sup> Xiaoqin Li,<sup>‡</sup> Mengzhen Zhang, Ying Li and Dailian Wang\*

*College of Chemistry and Chemical Engineering, Ningxia Normal University, GuYuan 756000, China.*

<sup>‡</sup>These authors contributed equally to this work. They should thus be considered co-first authors.

\*Corresponding authors: NXSFEKF@126.com (E, Feng); wdl1731624323@163.com (D, Wang).

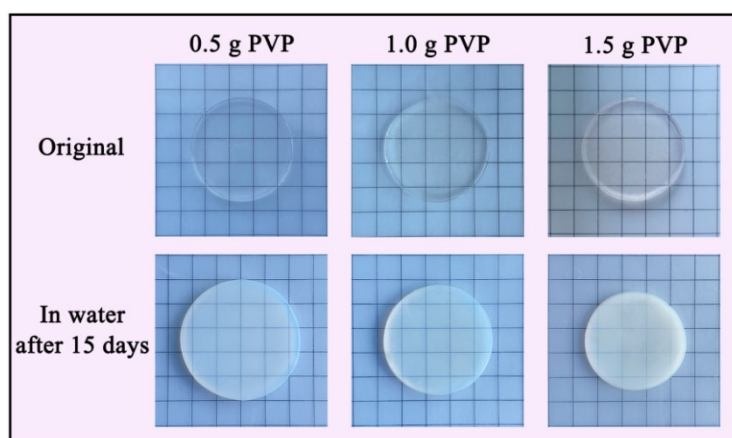

**Fig. S1.** The photographs of PHA organohydrogels with different PVP contents at the original state and after being immersed in water for 15 days.

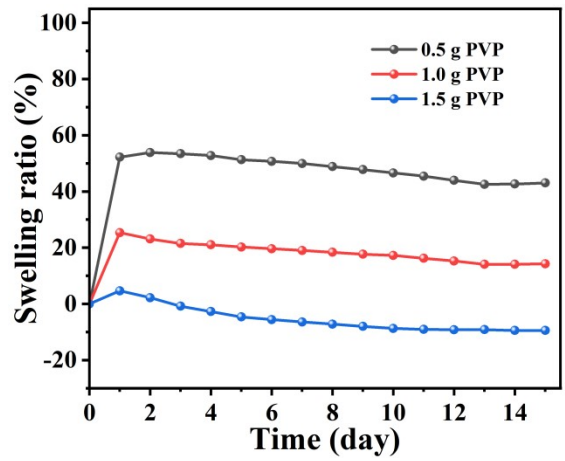

**Fig. S2.** Swelling ratio curves of PHA organohydrogels with different PVP contents as a function of swelling time in water.

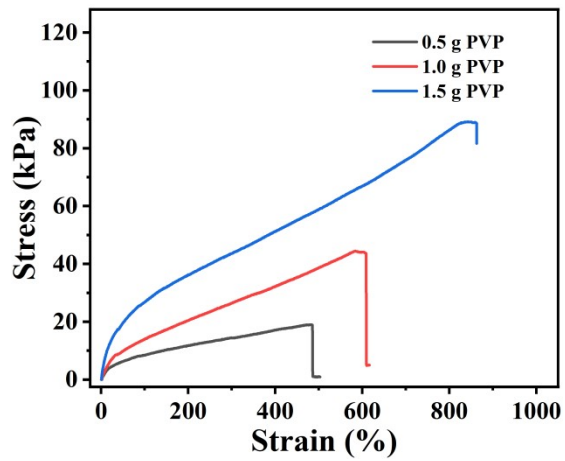

**Fig. S3.** Stress-strain curves of PHA organohydrogels with different PVP contents after being immersed in water for 15 days.

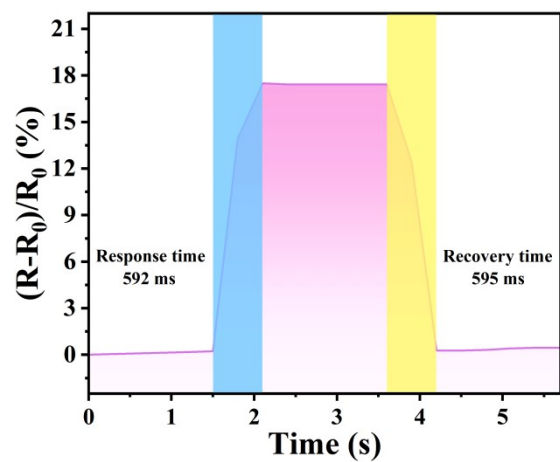

Fig. S4. The response time and recovery time of PHA organohydrogel-based sensor at 20 % strain.

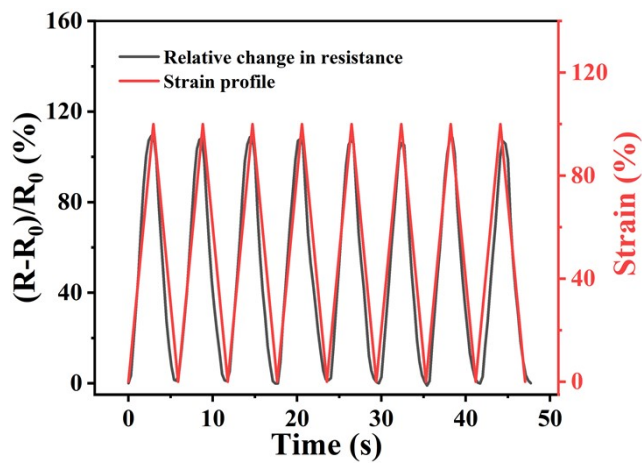

Fig. S5. Relative resistance changes of organohydrogel sensor during periodic stretching and releasing process at 100% strain.

**Table S1** The comparison of the self-healing efficiency for our organohydrogel with other recently reported hydrogel/organohydrogels.

| Hydrogel/Organohydrogel          | Original strain (%) | Self-healing strain (%) | Self-healing time | Self-healing efficiency | References |
|----------------------------------|---------------------|-------------------------|-------------------|-------------------------|------------|
| SSS-[BMIM]Cl hydrogel            | 1000                | 830                     | 48 h              | 83%                     | 1          |
| PCG organohydrogel               | 936                 | 873                     | 72 h              | 93.2%                   | 2          |
| APG2 hydrogel                    | 1179                | 1049                    | 12 h              | 89%                     | 3          |
| MAGP hydrogel                    | 500                 | 425                     | 16 h              | 85%                     | 4          |
| PSBMA-LM@PDA-5 hydrogel          | 555.5               | 500                     | 12 h              | 90%                     | 5          |
| PVA/PA/Fe <sup>3+</sup> hydrogel | 924                 | 667                     | 36 h              | 72%                     | 6          |
| PAAN hydrogel                    | 2590                | 1866                    | 72 h              | 72%                     | 7          |
| PCOBE organohydrogel             | 880                 | 706                     | 24 h              | 80.3%                   | 8          |
| PNAGA/PNIPAm/AgNW-4 hydrogel     | ~1800               | 1324                    | 24 h              | 73.89%                  | 9          |
| PHA organohydrogel               | 942                 | 889                     | 12 h              | 94%                     | This work  |

1 X. Zhang, G. Zhang, X. Huang, J. He, Y. Bai and L. Zhang, *ACS Appl. Mater. Interfaces*, 2022, **14**, 30256-30267.

2 Z. Zhou, K. Liu, Z. Ban and W. Yuan, *Compos. Part A*, 2022, **154**, 106806.

3 Y. Li, X. Xie, Q. Zhu, S. Lu and Y. Bai, *J. Mater. Chem. A*, 2022, **10**, 22205-22213.

4 L. Dong, M. Wang, J. Wu, C. Zhu, J. Shi and H. Morikawa, *ACS Appl. Mater. Interfaces*, 2022, **14**, 9126-9137.

5 Y. Chen, C. Zhang, R. Yin, M. Yu, Y. Liu, Y. Liu, H. Wang, F. Liu, F. Cao, G. Chen and W. Zhao, *Mater. Horiz.*, 2023, **10**, 3807-3820.

6 J. Lin and X. Du, *Chem. Eng. J.*, 2022, **446**, 137244.

7 G. Su, S. Yin, Y. Guo, F. Zhao, Q. Guo, X. Zhang, T. Zhou and G. Yu, *Mater. Horiz.*, 2021, **8**, 1795-1804.

8 B. Song, X. Fan, J. Shen and H. Gu, *Chem. Eng. J.*, 2023, **474**, 145780.

9 S. J. Ge, S. N. Liu, Z. Z. Gu and H. Xu, *Small Methods*, 2023, DOI: 10.1002/smtd.202300749.
